## The Pharmacokinetics of *d*-Tubocurarine with Surgery Involving Salvaged Autologous Blood

Colin A. Shanks, M.D.,\* Michael J. Avram, Ph.D.,† Ann K. Ronai, M.B., B.S., Ph.D.,‡  
and Dennis J. Bowsher, M.D.§

The disposition of *d*-tubocurarine (*d*Tc) was assessed when a bolus and infusion dosage regimen was used to obtain relaxation during major orthopedic surgery on the spine. Renal clearance of *d*Tc was  $0.63 \pm 0.23 \text{ ml} \cdot \text{min}^{-1} \cdot \text{kg}^{-1}$  and was correlated with creatinine clearance. Total plasma clearance of  $1.21 \pm 0.40 \text{ ml} \cdot \text{min}^{-1} \cdot \text{kg}^{-1}$  was lower than that found in many previous studies, and the predetermined continuous *d*Tc infusion produced an apparent plateau in plasma concentrations of  $1.8 \pm 0.3 \mu\text{g} \cdot \text{ml}^{-1}$ . Despite the operative blood loss, these concentrations were greater than anticipated and were associated with a more intense neuromuscular blockade than the infusion was designed to produce. Autologous blood transfusion was used to reduce the reliance on homologous donor blood, and the erythrocytes from the  $2.2 \pm 1.2 \text{ l}$  of blood loss during the procedure were reinfused after intraoperative salvage, washing, and centrifugation. With  $80 \pm 23 \text{ mg}$  *d*Tc administered,  $1.4 \pm 0.8\%$  was recovered from the fluid discarded after centrifugation. These results indicate that even massive intraoperative blood loss will not entail a significant reduction in the amount of *d*Tc present in the body. (Key words: Neuromuscular relaxants: tubocurarine. Pharmacokinetics: tubocurarine. Transfusion: autologous.)

EACH BLOOD TRANSFUSION carries a certain risk, and reinfusion of the patient's own blood has advantages over the use of homologous donor blood. Although autologous blood transfusion is an old technique, recent technologic developments have suggested that it could be cost-effective for use in orthopedic surgery.<sup>1</sup> The Cell Saver® (Hemonetics, Braintree, Massachusetts) is a device that salvages blood removed by suction from the operative field, then filters, washes, and concentrates it to provide packed cells for return to the patient. When a drug does not enter erythrocytes, all the drug in the blood is carried in the plasma; plasma loss then would be equivalent to blood loss in decreasing the amount of drug in the patient, despite the reinfusion of washed red blood cells. As most of the plasma lost during surgery is included in the fluid discarded after centrifugation in the Cell Saver®, its use provides the opportunity to quantitate drug removal with intraoperative blood loss.

This study was designed to examine the disposition of *d*-tubocurarine administered by a bolus and infusion technique<sup>2</sup> to a group of patients likely to lose blood during major orthopedic surgery.

### Methods

#### SUBJECTS

The 10 adult patients studied were undergoing surgery for Luque subsegmental instrumentation of their scoliosis. Written informed consent was obtained according to the institutionally approved protocol. Demographics of the patient group are shown in table 1.

#### CONDUCT OF THE STUDY

Following premedication with morphine, 5–10 mg im, an intravenous infusion of 5% dextrose in lactated Ringer's solution was begun, to provide preoperative hemodilution. Fluids were administered at a rate of  $15 \text{ ml} \cdot \text{kg}^{-1}$  in the first hour, and hemodilution was assessed by a reduction in hemoglobin concentration and colloid osmotic pressure (table 1). A radial artery catheter was placed before induction of anesthesia for later measurement of blood pressure, blood gases, and blood sampling. Anesthesia was induced with thiopental and maintained with enflurane in oxygen, supplemented with either nitrous oxide or fentanyl.

Sustained muscular relaxation was provided by a pharmacokinetically designed regimen for *d*-tubocurarine (*d*Tc), intended to produce 95% paralysis.<sup>2</sup> The "steady state" plasma concentration ( $C_{ss}$ ) of *d*Tc associated with 95% paralysis can be calculated to average between 1.0 and  $1.2 \text{ mg} \cdot \text{l}^{-1}$  by pharmacodynamic modeling.<sup>3,4</sup> A bolus of *d*Tc,  $0.6 \text{ mg} \cdot \text{kg}^{-1}$ , administered simultaneously with commencement of an infusion at  $0.18 \text{ mg} \cdot \text{kg}^{-1} \cdot \text{h}^{-1}$  should be associated with a plateau of  $1.1 \text{ mg} \cdot \text{l}^{-1}$  in the *d*Tc plasma concentrations.<sup>2</sup> Given the high therapeutic index of *d*Tc and its small volume of distribution, this regimen was able to be obtained from the apparent volume of distribution at steady state ( $V_{ss}$ ) and the plasma elimination clearance ( $Cl_E$ ), as described by Mitlenko and Ogilvie<sup>5</sup>:

$$\text{Bolus dose} = V_{ss} \times C_{ss} \quad (1)$$

$$\text{Infusion rate} = Cl_E \times C_{ss} \quad (2)$$

\* Professor of Anesthesia.

† Assistant Professor of Anesthesia.

‡ Assistant Professor of Clinical Anesthesia.

§ Fellow in Clinical Pharmacology.

Received from the Departments of Anesthesia and Medicine and Clinical Pharmacology Center, Northwestern University, Chicago, Illinois 60611. Accepted for publication August 24, 1984. Supported in part by grant GM-07842 from the National Institute of General Medical Sciences National Institutes of Health.

Address reprint requests to Dr. Shanks.

TABLE 1. Clinical Details of the Patients (Mean  $\pm$  SD)

|                                                                  |                |
|------------------------------------------------------------------|----------------|
| Sex                                                              | 2 M, 8 F       |
| Age (yr)                                                         | 37 $\pm$ 17    |
| Wt (kg)                                                          | 63 $\pm$ 15    |
| Hemoglobin (g $\cdot$ dl <sup>-1</sup> )                         | 12.8 $\pm$ 2.4 |
| Colloid osmotic pressure (mOsm $\cdot$ l <sup>-1</sup> )         | 16.0 $\pm$ 3.2 |
| Intraoperatively:                                                |                |
| Operation time (h)                                               | 4.4 $\pm$ 1.0  |
| Minimum hemoglobin (g $\cdot$ dl <sup>-1</sup> )                 | 10.0 $\pm$ 1.6 |
| Minimum colloid osmotic pressure (mOsm $\cdot$ l <sup>-1</sup> ) | 11.6 $\pm$ 1.4 |
| Intravenous crystalloid (l)                                      | 6.5 $\pm$ 2.6  |
| Measured blood loss (l)                                          | 2.2 $\pm$ 1.2  |
| Salvaged packed cells returned (l)                               | 0.8 $\pm$ 0.3  |

Neuromuscular blockade was assessed at the hand by measuring the ratio of the fourth to the first twitch amplitudes resulting from four supramaximal stimuli delivered to the ulnar nerve at 2 Hz (train-of-four stimulation).

Plasma samples were obtained from the arterial blood taken at appropriate intervals until 12 h after the infusion was discontinued. Urine samples were collected, volumes were recorded, and aliquots were saved at half hourly intervals during the infusion, with further collections in the remainder of the intraoperative period, and for 24 h postoperatively. Following the final centrifugation of blood in the Cell Saver,<sup>®</sup> the volume of extracted fluid was measured and an aliquot was taken.

#### ASSAY PROCEDURES

The Cell Saver<sup>®</sup> fluid, the urine, and blood samples were stored at  $-30^{\circ}$  C for later *d*Tc analysis. Total concentrations of *d*Tc were determined in duplicate by a specific high-performance liquid chromatographic technique sensitive to 25 ng  $\cdot$  ml<sup>-1</sup> (coefficient of variation: less than 5% above 50 ng  $\cdot$  ml<sup>-1</sup>).<sup>6</sup> Plasma and urine creatinine concentrations were assayed by using a modified Jaffé reaction.<sup>7</sup>

#### DATA ANALYSIS

Pharmacokinetic analyses were made with the SAAM 23 computer program<sup>†</sup> implemented on a Control Data Corporation Cyber 170/730<sup>®</sup> computer. Tubocurarine distribution and elimination kinetics were modeled with a three-compartment open mammillary system with elimination from the central compartment. The three-compartment structure of this model reflects the heterogeneity of interstitial fluid space.<sup>8</sup> The nonlinear least-squares regression program was used to characterize the

disposition of *d*Tc, simultaneously modeling data from plasma, urine, and Cell Saver<sup>®</sup> fluid, to derive estimates of the apparent volume of distribution of the central compartment ( $V_C$ ), the intercompartmental rate constants, and the elimination rate constant. These were used to calculate<sup>9</sup> the volumes of the fast and slow compartments ( $V_F$  and  $V_S$  in fig. 1), their intercompartmental clearances ( $Cl_F$  and  $Cl_S$ ), and the elimination clearance ( $Cl_E$ ), using the general equation for clearance ( $Cl$ ), volume ( $V$ ), and its associated rate constant ( $k$ ):

$$Cl = k_{ij}V_i = k_{ji}V_j \quad (3)$$

The volume of distribution at steady state ( $V_{SS}$ ) is the sum of  $V_C$ ,  $V_F$  and  $V_S$ .

Renal clearance ( $Cl_R$ ) of *d*Tc was determined from the ratio of the urinary excretion rate of unchanged drug to the simultaneous plasma concentration at the midpoint of the collection period:

$$Cl_R = \frac{\text{urine flow} \times \text{urine concentration}}{\text{plasma concentration}} \quad (4)$$

The three-compartment model was modified as shown in figure 1 by using the time-interrupt feature of the SAAM program to include the Cell Saver<sup>®</sup> clearance ( $Cl_{CS}$ ), derived from plasma *d*Tc concentration and *d*Tc recovered from the centrifuged fluid, as previously described for calculating dialytic clearance.<sup>10</sup>

Postoperative creatinine clearances were calculated from the 24-h urine collections. Estimates of the 24-h renal clearances of creatinine were correlated by linear least-squares regression analysis with estimates of the renal clearance of *d*Tc obtained from the model.

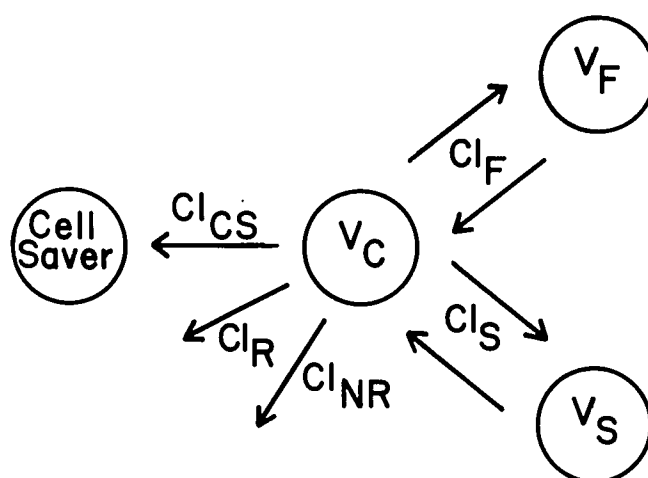

FIG. 1. The multicompartmental model used to characterize the disposition of *d*Tc. Drug in the central compartment ( $V_C$ ) redistributes into the fast volume ( $V_F$ ) and slow volume ( $V_S$ ) peripheral compartments at rates dictated by the intercompartmental clearances ( $Cl_F$  and  $Cl_S$ ). Plasma elimination clearance comprised renal clearance ( $Cl_R$ ) and nonrenal clearance ( $Cl_{NR}$ ). Clearance via the Cell Saver<sup>®</sup> ( $Cl_{CS}$ ) was not included in nonrenal clearance.

<sup>†</sup> Berman M, Weiss MF: SAAM Manual (Public Health Service Publication No. 1703). Washington, D. C., U. S. Government Printing Office, 1967.

## Results

Intravenous infusion of crystalloids prior to major blood loss produced hemodilution in the patients with the hemoglobin concentration decreasing to as low as  $8 \text{ g} \cdot \text{dl}^{-1}$  and colloid osmotic pressures to  $10 \text{ mOsm} \cdot \text{l}^{-1}$  (table 1). Measured blood loss ranged from 1.0 to 4.8 l, with most lost in the latter part of the procedure, following extensive dissection of the thoracolumbar vertebrae and the iliac donor site. Almost all of this was collected by suction, washed, and returned to the patient as packed cells as it accumulated: previous studies suggest a red blood cell harvest of 52–54%.<sup>1</sup> Homologous donor blood was not used in the intraoperative care of four patients, of the remainder, only one then received more than one unit of donor blood.

A typical *d*Tc plasma concentration–time curve is shown in figure 2. The initial dose of *d*Tc,  $0.6 \text{ mg} \cdot \text{kg}^{-1}$ , provided conditions suitable for tracheal intubation in all but one subject. The *d*Tc infusion maintained good relaxation throughout its 2.8 to 6.0 h of infusion. The *d*Tc plasma concentrations at the end of its infusion was  $1.8 \pm 0.3 \text{ mg} \cdot \text{l}^{-1}$ , a level in excess of the expected  $1.1 \text{ mg} \cdot \text{l}^{-1}$ , the plasma concentration associated with 95% paralysis.<sup>2–4</sup> During *d*Tc infusion, the twitch response was absent in all but one of the patients. The decision to discontinue *d*Tc administration during the concluding

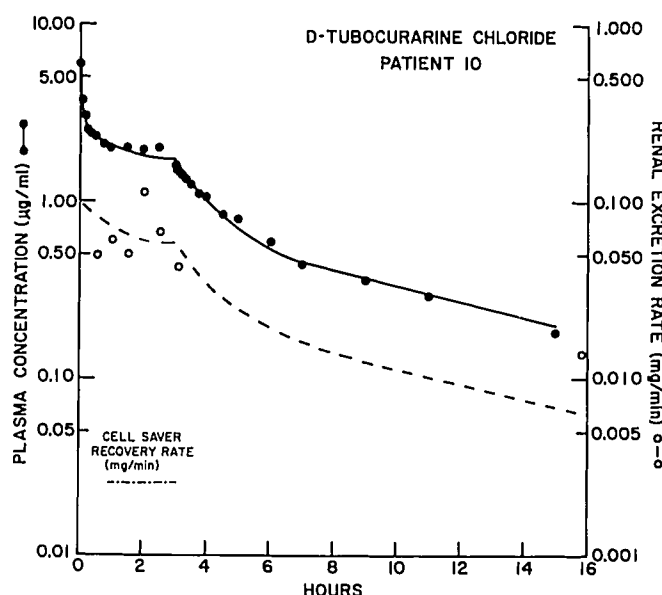

FIG. 2. Analysis of plasma *d*Tc concentrations and urinary and Cell Saver® elimination in patient 10, whose *d*Tc infusion was continued for 3 h. The curves represent two computer-generated least-squares fits of the experimental data and the Cell Saver®, elimination rate during its operation. All the plasma, Cell Saver®, and urinary data were modeled simultaneously. The urine datum point at 16 h represents the midpoint of the postoperative 24 h urine collection begun at the fourth hour, the end of surgery. The lowermost line (Cell Saver® recovery rate) indicates the duration of blood salvage, and its single value is referenced to the right-hand ordinate scale.

TABLE 2. Tubocurarine Dosages and Recovery

|                                                                             |             |
|-----------------------------------------------------------------------------|-------------|
| Total dose (mg)                                                             | 80 ± 23     |
| Infusion time (h)                                                           | 3.8 ± 1.0   |
| Amount discarded from Cell Saver®                                           |             |
| mg                                                                          | 1.2 ± 0.8   |
| % dose                                                                      | 1.4 ± 0.8   |
| Amount recovered intraoperatively from urine                                |             |
| mg                                                                          | 13.6 ± 7.9  |
| % dose                                                                      | 15.3 ± 5.9  |
| Total amount recovered from urine intraoperatively and 24 h postoperatively |             |
| mg                                                                          | 44.7 ± 16.8 |
| % dose                                                                      | 54.0 ± 17.0 |

stages of surgery was timed by the intensity of paralysis. Neuromuscular blockade therefore could be reversed easily in all patients to permit early postoperative assessment of cord function. The *d*Tc infusion and the use of the Cell Saver® were completed at approximately the same time. The average amount of *d*Tc recovered from the discarded cell-washing fluid represents  $1.4 \pm 0.8\%$  of the dose administered (table 2), an order of magnitude less than that recovered intraoperatively from the urine. The amount of *d*Tc recovered in the urine intraoperatively and for the subsequent 24 h averaged 15% and 37% of the dose, respectively, to total  $54 \pm 17\%$  recovery.

The pharmacokinetic parameters shown in table 3 were derived when plasma, Cell Saver®, and urinary data were fitted simultaneously. The apparent volume of distribution at steady state ( $V_{ss}$ ) was  $587 \pm 114 \text{ ml} \cdot \text{kg}^{-1}$ , of which 9% was the central volume. When the mean  $V_{ss}$  is substituted in equation (1), the calculated bolus dose of *d*Tc increases from  $0.6 \text{ mg} \cdot \text{kg}^{-1}$  to  $0.65 \text{ mg} \cdot \text{kg}^{-1}$ . The plasma clearance ( $Cl_E$ ) of  $75 \pm 26 \text{ ml} \cdot \text{min}^{-1}$  was the summation of renal and nonrenal clearances in approximately equal proportions. On a weight basis,  $Cl_E$  is  $1.22 \pm 0.40 \text{ ml} \cdot \text{kg}^{-1} \cdot \text{min}^{-1}$ ; substituted in equation (2) for a  $C_{ss}$  of  $1.1 \text{ mg} \cdot \text{l}^{-1}$ , the calculated infusion rate decreases from  $0.18 \text{ mg} \cdot \text{kg}^{-1} \cdot \text{h}^{-1}$  to  $0.08 \text{ mg} \cdot \text{kg}^{-1} \cdot \text{h}^{-1}$ . Were the actual infusion to have continued, this clearance would have been associated with a  $C_{ss}$  of  $2.5 \text{ mg} \cdot \text{l}^{-1}$ , confirming that the plateau value of  $1.8 \pm 0.3 \text{ mg} \cdot \text{l}^{-1}$  was not a true steady state.

With the plasma concentration–time data fitted to the model in figure 1, the time-averaged plasma renal clearance for the study period was  $0.63 \pm 0.23 \text{ ml} \cdot \text{min}^{-1} \cdot \text{kg}^{-1}$ . The regression line relating the (24 h) creatinine clearances with the plasma renal clearances shown in table 3 is  $Cl_{R(dTc)} = 0.32 Cl_{Cr} + 0.08$ , with  $r = 0.90$  (fig. 3).

When red blood cell partitioning was measured for five subjects, in the range  $50\text{--}5000 \text{ ng} \cdot \text{ml}^{-1}$ ,  $14 \pm 7\%$  of the *d*Tc was in erythrocytes.

TABLE 3. The Disposition of Tubocurarine\* in 10 Patients

| Pt. no.      | Wt. (kg) | Distribution Volumes (ml·kg <sup>-1</sup> ) |                |                |                 | Clearances (ml·min <sup>-1</sup> ) |                 |                 |                  |                 |                  | Elimination Half-life, (h) |
|--------------|----------|---------------------------------------------|----------------|----------------|-----------------|------------------------------------|-----------------|-----------------|------------------|-----------------|------------------|----------------------------|
|              |          | V <sub>c</sub>                              | V <sub>f</sub> | V <sub>s</sub> | V <sub>ss</sub> | Cl <sub>f</sub>                    | Cl <sub>s</sub> | Cl <sub>R</sub> | Cl <sub>NR</sub> | Cl <sub>E</sub> | Cl <sub>CS</sub> |                            |
| 1            | 95       | 38                                          | 120            | 508            | 666             | 812                                | 98              | 62              | 49               | 111             | 6.3              | 7.90                       |
| 2            | 55       | 38                                          | 140            | 300            | 478             | 465                                | 92              | 44              | 37               | 81              | 5.7              | 5.25                       |
| 3            | 60       | 89                                          | 130            | 268            | 487             | 594                                | 128             | 64              | 48               | 112             | 8.5              | 3.99                       |
| 4            | 47       | 43                                          | 188            | 220            | 451             | 437                                | 23              | 14              | 35               | 49              | 1.7              | 5.81                       |
| 5            | 51       | 33                                          | 191            | 598            | 822             | 386                                | 62              | 37              | 20               | 57              | 5.0              | 11.00                      |
| 6            | 65       | 28                                          | 93             | 396            | 517             | 412                                | 88              | 29              | 25               | 54              | 6.3              | 9.97                       |
| 7            | 69       | 43                                          | 116            | 474            | 633             | 548                                | 139             | 23              | 15               | 38              | 2.8              | 15.40                      |
| 8            | 57       | 88                                          | 188            | 392            | 668             | 507                                | 46              | 41              | 56               | 97              | 1.5              | 6.56                       |
| 9            | 80       | 40                                          | 105            | 460            | 605             | 715                                | 90              | 49              | 33               | 82              | 13.9             | 10.74                      |
| 10           | 55       | 71                                          | 127            | 345            | 543             | 729                                | 59              | 34              | 39               | 73              | 1.3              | 7.47                       |
| Mean<br>± SD | 63 ± 15  | 51 ± 23                                     | 140 ± 36       | 396 ± 117      | 587 ± 114       | 560 ± 148                          | 83 ± 36         | 40 ± 16         | 36 ± 13          | 75 ± 26         | 5.3 ± 3.9        | 8.41 ± 3.40                |

\* Shown schematically in figure 1, the volumes of the central, fast, and slow compartments (V<sub>c</sub>, V<sub>f</sub>, and V<sub>s</sub>) summate to give the apparent volume of distribution at steady state (V<sub>ss</sub>). Multiplication with the appropriate rate constant gives the clearance to the fast and slow

compartments (Cl<sub>f</sub> and Cl<sub>s</sub>) and the elimination rate constant (Cl<sub>E</sub>). Renal clearance (Cl<sub>R</sub>) and Cell Saver® clearance (Cl<sub>CS</sub>) were derived by urine and discarded fluid collection, respectively. Cl<sub>E</sub> is the sum of Cl<sub>R</sub> and nonrenal clearance (Cl<sub>NR</sub>).

### Discussion

This study reports the pharmacokinetics of *d*Tc in a group of adult patients undergoing extensive surgery to the thoracolumbar spine. Measures taken to combat operative blood loss included the prior intravenous administration of 2–3 l of crystalloid solution and the reinfusion of washed red blood cells harvested by surgical suction from the prone patient. It would seem likely that organ functions were affected by hemodynamics because of the intraoperative posture and the administration of enflurane; there is no reason to assume the restoration of normal hepatic or renal function with

resumption of supine posture and return of consciousness. Continuing depression of organ function after a potent inhalation agent has been demonstrated in sheep.\*\* These factors may account for the difference found in these patients and the pharmacokinetics parameters reported elsewhere.

The mean elimination half-life exceeded 8 h, longer than the 1.3–5.7 h reported by most investigators,<sup>11–18</sup> and was associated with a low mean plasma clearance of 1.2 ml·min<sup>-1</sup>·kg<sup>-1</sup>. The low total plasma clearance of *d*Tc in our patients was reflected in the apparent plateau of *d*Tc concentrations at 1.8 mg·l<sup>-1</sup>, rather than the desired 1.1 mg·l<sup>-1</sup>, with abolition of the twitch response. This resulted in an early termination of the *d*Tc infusion, recognizing that spontaneous recovery from paralysis would be slower than usual when the twitch response returned. Although these data imply considerable differences in the disposition of *d*Tc in our patients, this was not reflected in its total renal excretion in 24 h (table 2).

Three groups recently have reported urinary recovery of *d*Tc in humans of 65, 38, and 44% of the dose.<sup>12,16,18</sup> We have found that renal mechanisms account for approximately 52% of *d*Tc elimination (table 3), and our results suggest that renal *d*Tc clearance is a function of glomerular filtration rate (fig. 3). This is consistent with the results of previous investigators who have shown that administration of mannitol markedly increases urinary volume without increasing *d*Tc excretion.<sup>16</sup> Binding of *d*Tc to plasma proteins<sup>19</sup> appears to restrict its renal elimination and to account for the fact that renal *d*Tc clearance is less than glomerular filtration rate.

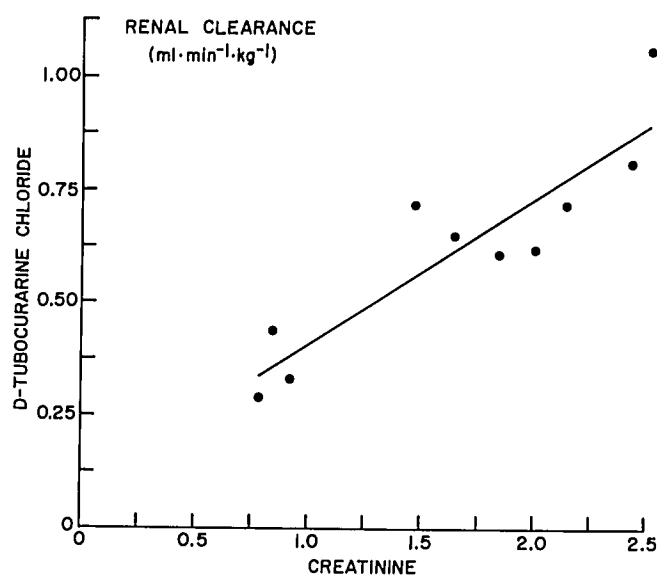

FIG. 3. The renal clearances of creatinine and *d*Tc:  
 $Cl_{R(dTc)} = 0.32 Cl_{Cr} + 0.08$ ,  $r = 0.90$ .

\*\* Mather LE, personal communication.

In the present study we found that nonrenal mechanisms account for approximately 48% of *d*Tc elimination (table 3). Meijer *et al.*, using tritiated *d*Tc, reported that in 48 h nearly 63% of the dose was excreted in the urine, and, of the 37% estimated to be cleared by nonrenal mechanisms, only 12% could be accounted for by biliary excretion of unmetabolized drug.<sup>12</sup> Their failure to account for the total dose may be due in part to difficulties with total bile collection and to exchange of tritium with the body water during the study period.

In rat studies, these workers reported that 51% of the administered *d*Tc was excreted in the bile during 2 h of perfusion.<sup>20</sup> This compared with only 16% for metocurine; neither substance showed biotransformation. The octanol/water partitioning for *d*Tc was 15, while that for metocurine was 1. This greater lipophilicity is in agreement with the entry of *d*Tc into the erythrocytes.

Early studies suggested that *d*Tc initially is distributed in plasma water and that its total apparent volume of distribution is slightly less than extracellular space.<sup>21</sup> The present study also found a central volume of distribution, 51 ml·kg<sup>-1</sup>, that is similar to the expected volume of plasma water. The total apparent volume of distribution in our study, 587 ml·kg<sup>-1</sup>, is greater than that expected for extracellular fluid, in part due to deliberate fluid loading (table 1). Our average result is larger than the 248 to 523 ml·kg<sup>-1</sup> reported elsewhere.<sup>11-18</sup>

Blood loss, salvaged by the Cell Saver®, augmented total *d*Tc clearance by 7.2% (table 3). A total of 1.4% of the *d*Tc dose was recovered from the fluid after the erythrocytes were salvaged (table 2), drug that had been distributed in the central compartment. Most of the *d*Tc in blood is in the plasma. If the plasma concentration of 1.8 mg·l<sup>-1</sup> was a true steady state, then this would have been the concentration throughout the distribution volume. By multiplication with the mean V<sub>ss</sub>, the average amount of *d*Tc in the body would be estimated conservatively to be 68 mg. Loss of the complete central volume then would result in a loss of 9% of this, less than 6 mg of *d*Tc. These results indicate that even massive blood loss will not entail a significant reduction in total body *d*Tc content.

The authors are grateful to Dr. M. Schafer for allowing them to study his patients, to Susan Buss for technical assistance, and to Dr. A. J. Atkinson, Jr., for his helpful advice.

## References

1. Turner RH, Steady HM: Cell washing in orthopedic surgery, Autotransfusion. Edited by Hauer JM, Thurer RL, Dawson RB. New York, Elsevier North Holland, 1981, pp 43-50
2. Ramzan MI, Shanks CA, Triggs EJ: Pharmacokinetics of tubocurarine administered by combined IV bolus and infusion. *Br J Anaesth* 52:893-899, 1980
3. Sheiner LB, Stanski DR, Vozeh S, Miller RD, Ham J: Simultaneous modeling of pharmacokinetics and pharmacodynamics: Application to d-tubocurarine. *Clin Pharmacol Ther* 25:358-371, 1979
4. Shanks CA, Ramzan MI, Triggs EJ: Studies in man with a constant-rate infusion of tubocurarine. *Anaesth Intensive Care* 7:209-214, 1979
5. Mitenko PA, Ogilvie RI: Rapidly achieved plasma concentration plateaus, with observations on theophylline kinetics. *Clin Pharmacol Ther* 13:329-335, 1972
6. Avram MJ, Shanks CA: Determination of d-tubocurarine chloride or metocurine iodide in human plasma by high-performance liquid chromatography with UV detection. *J Chromatogr* 306:398-404, 1984
7. Heinegard D, Tiderstrom G: Determination of serum creatinine by a direct colorimetric method. *Clin Chim Acta* 43:305-310, 1973
8. Henthorn TK, Avram MJ, Frederiksen MC, Atkinson AJ Jr: Heterogeneity of interstitial fluid space demonstrated by simultaneous kinetic analysis of the distribution and elimination of inulin and gallamine. *J Pharmacol Exp Ther* 222:389-394, 1982
9. Perrier D, Gibaldi M: Clearance and biologic half-life as indices of intrinsic hepatic metabolism. *J Pharmacol Exp Ther* 191:17-24, 1974
10. Stec GP, Atkinson AJ, Jr, Nevin MJ, Thenot JP, Ruo TI, Gibson TP, Ivanovich P, Del Greco F: N-Acetylprocainamide pharmacokinetics in functionally anephric patients before and after perturbation by hemodialysis. *Clin Pharmacol Ther* 26:618-628, 1979
11. Stanski DR, Ham J, Miller RD, Sheiner LB: Pharmacokinetics and pharmacodynamics of d-tubocurarine during nitrous oxide-narcotic and halothane anesthesia in man. *ANESTHESIOLOGY* 51:235-241, 1979
12. Meijer DKF, Weiering JG, Vermeer GA, Scaf AHJ: Comparative pharmacokinetics of d-tubocurarine and metocurine in man. *ANESTHESIOLOGY* 51:402-407, 1979
13. Stanski DR, Ham J, Miller RD, Sheiner LB: Time-dependent increase in sensitivity to d-tubocurarine during enflurane anesthesia in man. *ANESTHESIOLOGY* 52:483-487, 1980
14. Ham J, Stanski DR, Newfield P, Miller RD: Pharmacokinetics and dynamics of d-tubocurarine during hypothermia in humans. *ANESTHESIOLOGY* 55:631-635, 1981
15. Matteo RS, Brotherton WP, Nishitaten K, Khambatta HJ, Dias J: Pharmacodynamics and pharmacokinetics of metocurine in humans: Comparison to d-tubocurarine. *ANESTHESIOLOGY* 57:183-190, 1982
16. Matteo RS, Nishitaten K, Pua EK, Spector S: Pharmacokinetics of d-tubocurarine in man: Effect of an osmotic diuretic on urinary excretion. *ANESTHESIOLOGY* 52:335-338, 1980
17. Ramzan MI, Shanks CA, Triggs EJ: Studies of d-tubocurarine pharmacokinetics in humans and dogs. *Anaesth Intensive Care* 6:30-35, 1978
18. Miller RD, Matteo RS, Benet LZ, Sohn YJ: The pharmacokinetics of d-tubocurarine in man with and without renal failure. *J Pharmacol Exp Ther* 202:1-7, 1977
19. Walker JS, Shanks CA, Brown KF: Determinants of d-tubocurarine plasma protein binding in health and disease. *Anesth Analg* 62:870-874, 1983
20. Meijer DKF, Weiering JG, Vonk RJ: Hepatic uptake and biliary excretion of d-tubocurarine and trimethyltubocurarine in the rat in vivo and in isolated perfused rat livers. *J Pharmacol Exp Ther* 198:229-239, 1976
21. Kalow W: The distribution, destruction and elimination of muscle relaxants. *ANESTHESIOLOGY* 20:505-518, 1959
